# Supplementary material
Source: MDPI journal article supplement (https://www.mdpi.com/2073-4344/8/2/58)
Supplement: s1 [file s1]

Suplementary Materials: Highly Selective Continuous Flow Hydrogenation of Cinnamaldehyde to Cinnamyl Alcohol in a Pt/SiO2 Coated Tube Reactor

Yang Bai 1, Nikolay Cherkasov 1,2 , Steven Huband3, David Walker3, Richard I. Walton4 and Evgeny Rebrov 1,2,5,*

Figure S1. Acetal Formation with CAL and HCAL

The formation of acetals of CAL and HCAL was studied in 1.5 mL GC vials by adding 30 uL of either HCAL (>95 wt%) or CAL(>98 wt%) into 1000 uL of isopropanol (>99.5 wt%). The solutions were mixed and left at room temperature and analyzed over 10 h using gas chromatography. The same experiments were carried out when 5.0 mg of the 12 wt% Pt/SiO2 catalyst was added, and the results are presented in Figure S1.

The data show that no acetals are formed without the catalysts. When the catalyst is added, CAL quickly reaches an equilibrium concentration of about 10 mol%, while HCAL forms slower, but the equilibrium concentration is higher, around 15 mol%.


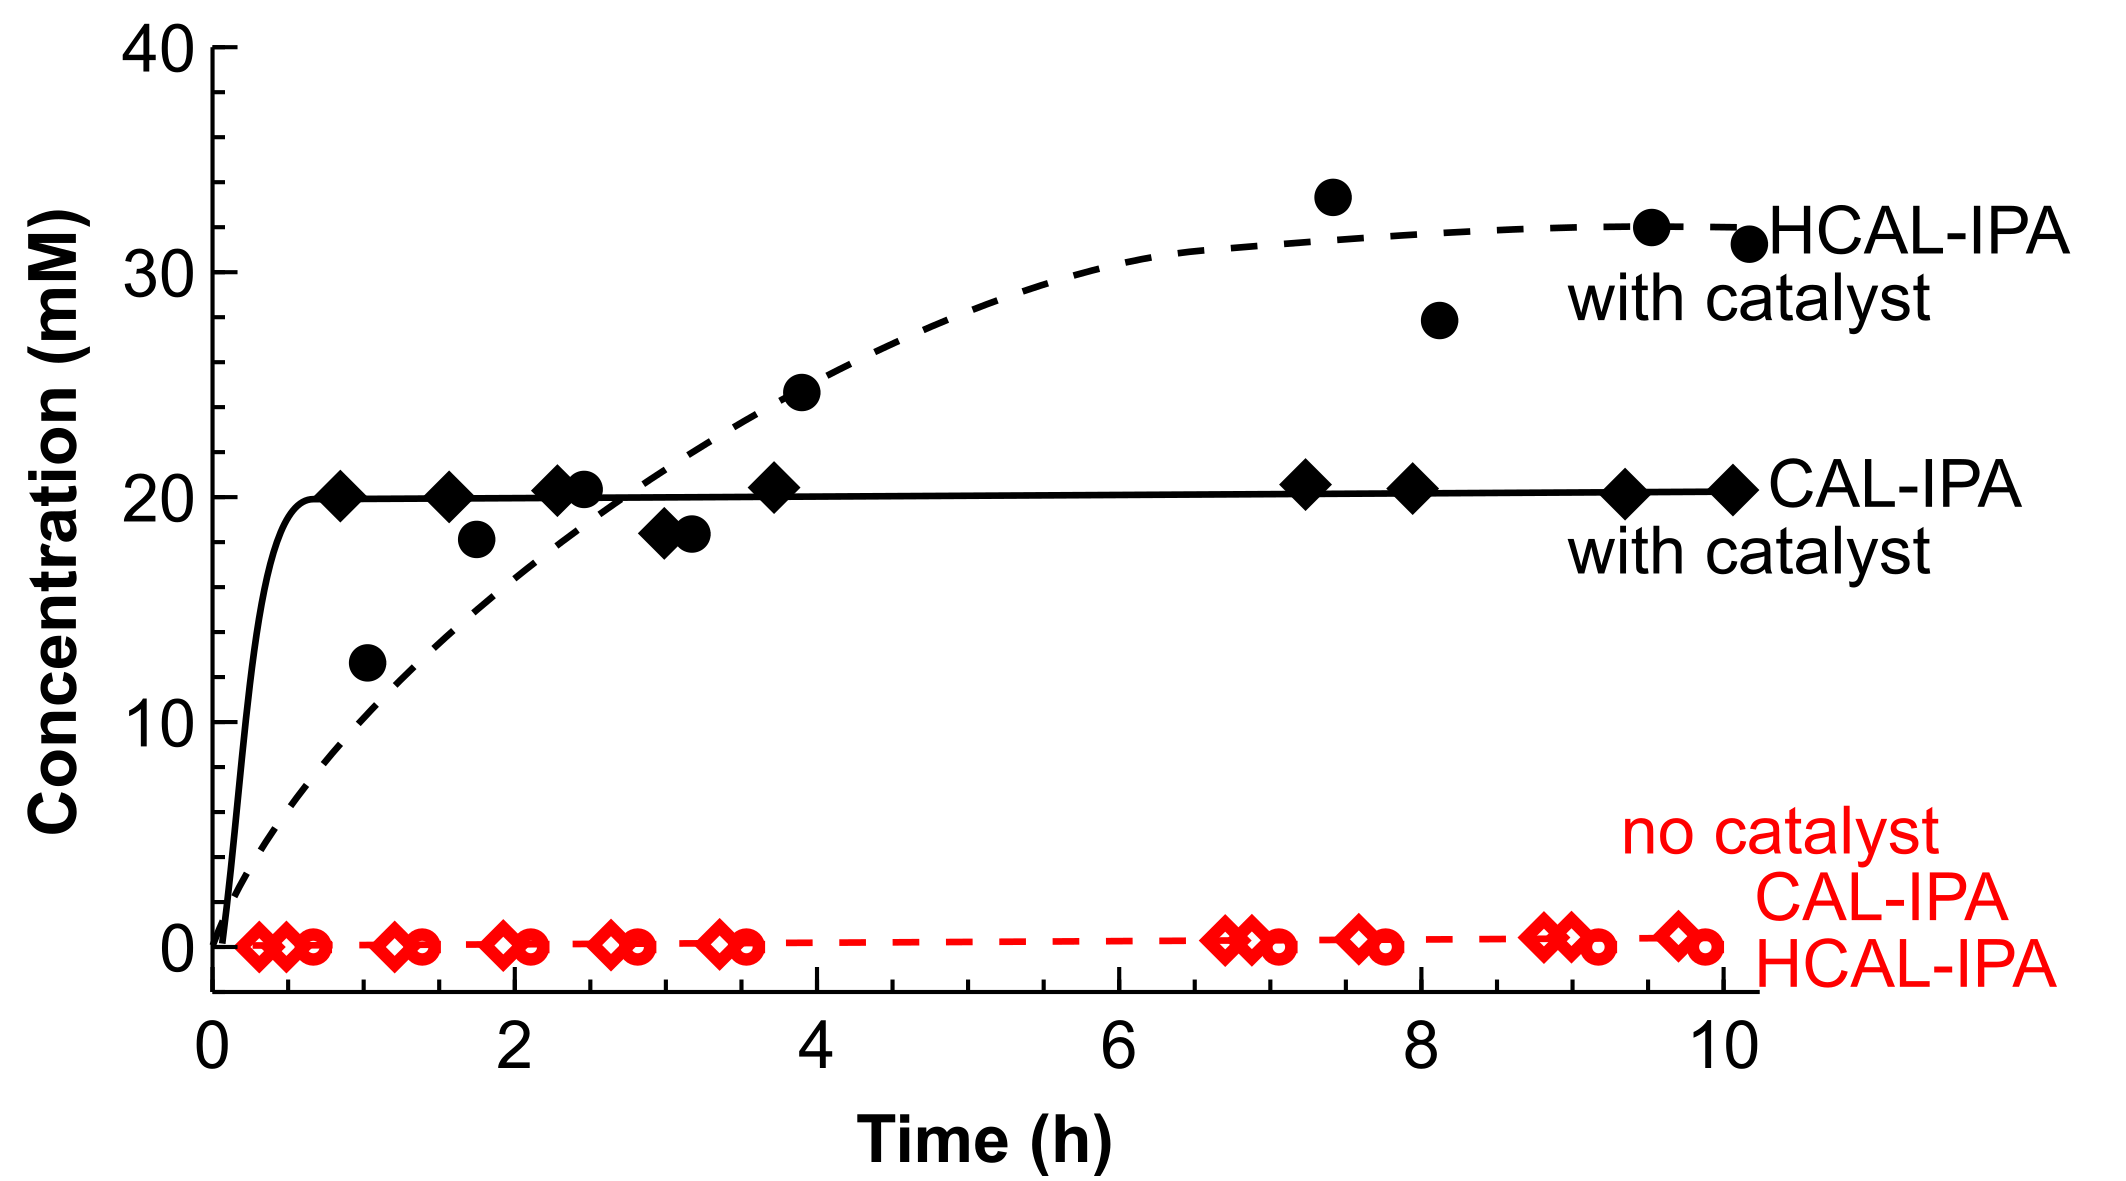


**Figure S1.** Concentration profiles of CAL and HCAL acetal formation with isopropanol at room temperature in a solution of 30 uL substrate and 1000 uL isopropanol with and without the presence of a 12 wt% Pt/SiO2 catalyst.

Figure S2. Increasing Reaction Rate with the Reaction Temperature

The study of the reaction rate was carried out at the reaction temperatures of 90, 120 and 150 °C using the same 2 m tube reactor coated with 12 wt% Pt/SiO2 catalyst in a flow of 0.8 M CAL in isopropanol of 0.2 mL min-1, a hydrogen flow rate of 3 mL min-1 (STP) and a pressure of 15 bar. The change in CAL conversion with the temperature is presented in Figure S2. Considering a preuso-zero order kinetics, which is a simplification of the system, the activation energy is determined to be 31.2 kJ mol-1. No change in product distribution was observed during the temperature studied.


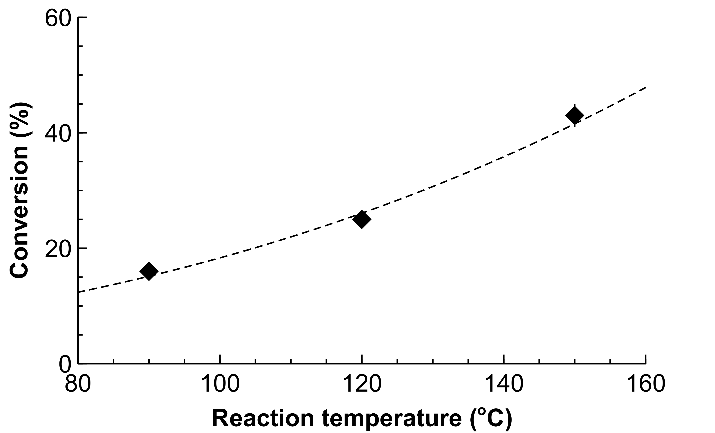


**Figure S2.** The effect of reaction temperature on CAL conversion in a 2 m tube reactor coated with a 12 wt% Pt/SiO2 catalyst; Reaction conditions: H2 flow rate 3 mL min-1, liquid flow 0.2 mL min-1, CAL concentration: 0.8 M CAL in IPA, pressure: 15 bar.
